# Supplementary material
Source: PubMed Central journal article supplement (PMC3668492)

## **Supplementary Figure Legends**

**Supplementary Figure 1: Few CD11c<sup>Hi</sup>B220<sup>+</sup> conventional dendritic cells are present in mid-gestation fetuses.** Gating strategy (A) and average percentage (B) of various leukocyte populations among E14.5 fetal liver mononuclear cells prior to transplantation. Two staining panels were used to phenotype the cells. Panel A: live/dead marker, CD45, Gr-1, CD3, B220, CD11, Class I, and Class II. Panel B: live/dead marker, CD45, Gr-1, F4/80, CD11, NK1.1, Class I, and Class II. Few dendritic cells were detected. n= 4 in two independent experiments.

**Supplementary Figure 2: Analysis of dendritic cell maturation in non-chimeric animals.** Relative mean fluorescence intensity (MFI) of Class II, B7-1, B7-2, and CD40 on host-derived APCs in spleens of chimeric and injected non-chimeric animals was calculated relative to a baseline population (CD11c<sup>-</sup>B220<sup>-</sup>) to account for experimental variability. No significant differences were observed in any comparison. Chimera n=7, injected non-chimera n=3.

**Supplementary Figure 3: Lack of semi-direct antigen presentation early after in utero transplantation in chimeric animals.** A. Representative flow cytometry plots of chimeric animals 2-3 weeks after allogeneic IUHCTx (B6 donor cells (H-2K<sup>b</sup>, I-A<sup>b</sup>) into BALB/c hosts (H-2K<sup>d</sup>, I-A<sup>d</sup>). After gating on live CD45<sup>+</sup> leukocytes, the expression of donor and host-specific Class II antigens was analyzed on donor and host-derived antigen presenting cells in spleen, lymph nodes, and bone marrow (spleen shown). Conventional dendritic cells (CD11c<sup>Hi</sup>B220<sup>Low</sup>, cDC), plasmacytoid DC (CD11c<sup>dim</sup>B220<sup>Hi</sup>, pDC), and

B cells (CD11c<sup>-</sup>B220<sup>Hi</sup>, B cell) were analyzed separately for the Class II expression.

There was no detectable expression of donor Class II on host APCs at this time point.

Chimera n=4, naïve n=4 in two independent experiments.

**B.** Representative flow cytometry plots demonstrating donor-derived APCs (CD11c<sup>+</sup>, H-2Kb<sup>+</sup>) in the thymus of chimeric animals.

**Supplementary Figure 4: Deletion and selective Treg survival depend on continued**

**chimerism.** Despite successful engraftment in 2-3 week-old 4C mice, all recipients analyzed at 5 weeks after IUHCTx had low (<1%) levels of engraftment. **(A)** In non-chimeric animals, there was no deletion in the thymus or the spleen. **(B)** There was no increase in the percentage of Tregs in thymus or spleen in injected non-chimeric animals but a decrease in %Tregs in spleen. Uninjected n=5, non-chimera n=5. \* p<0.05 by Student's t-test

**Supplementary Figure 5: Increase in percent but not number of splenic Tregs in**

**wild-type chimeras.** Percentage **(A)** and absolute number **(B)** of CD4<sup>+</sup>Foxp<sup>+</sup>CD25<sup>+</sup> Tregs among CD4 cells in thymi and spleens of wild-type chimeric and uninjected mice at 2 weeks after in utero transplantation. Uninjected n=6, chimera n=5. \*p<0.005 by Student's t-test.

# Supplementary Figure 1

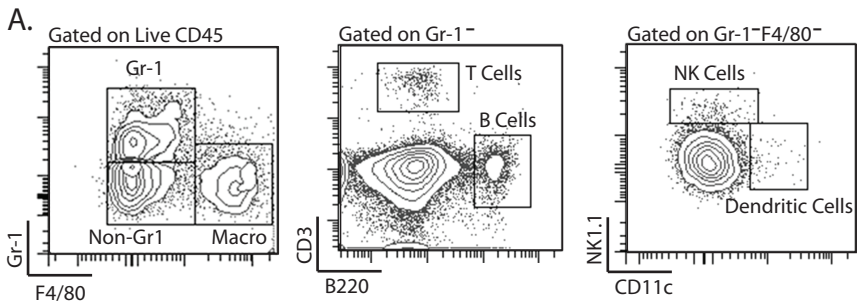

**B.**

| Cell Type       | % CD45 (SEM) |
|-----------------|--------------|
| Granulocytes    | 23.9 (2.2)   |
| Macrophages     | 15.0 (1.4)   |
| NK Cells        | 10.0 (3.2)   |
| B Cells         | 3.3 (0.5)    |
| T Cells         | 2.9 (0.6)    |
| Dendritic Cells | 0.3 (0.1)    |

Supplementary Figure 2

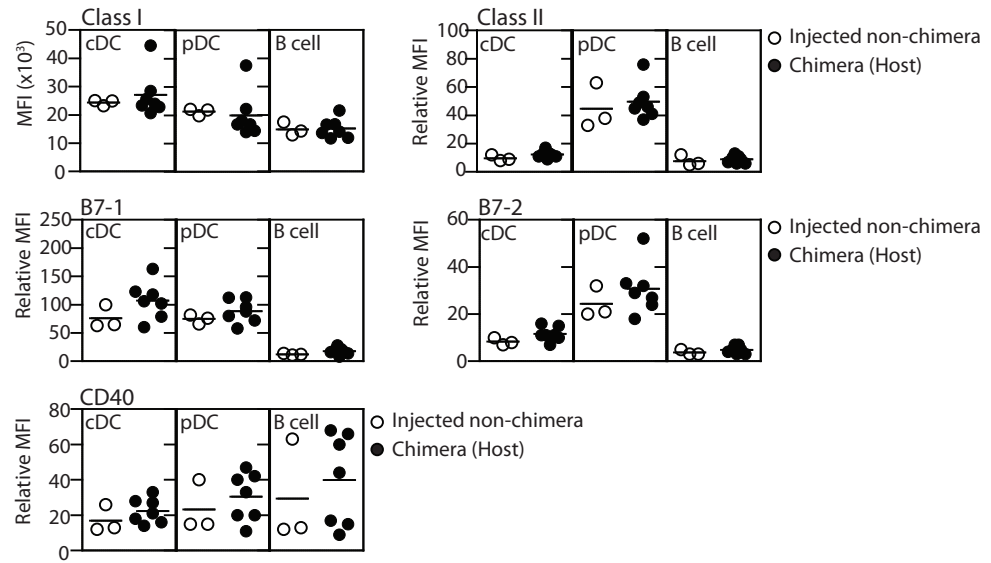

# Supplementary Figure 3

A.

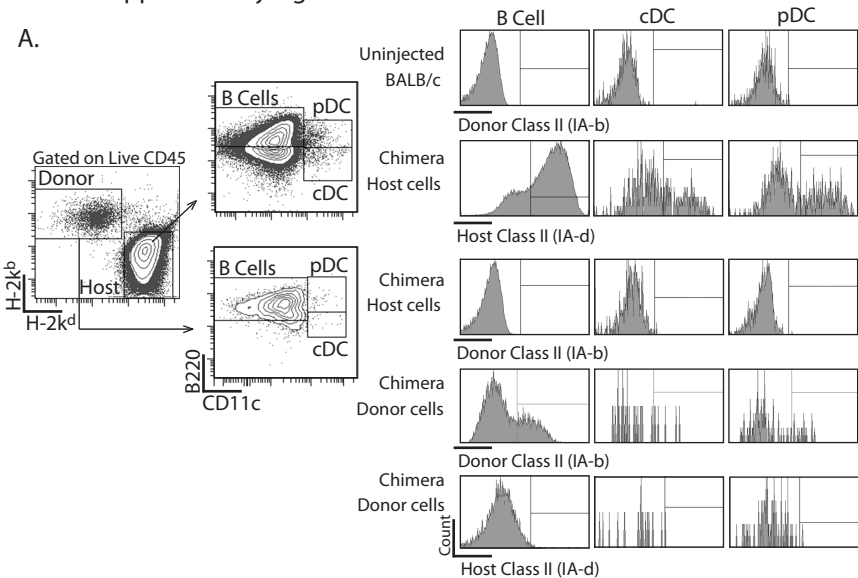

B.

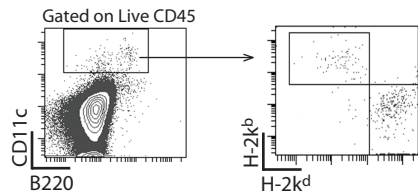

Supplementary Figure 4

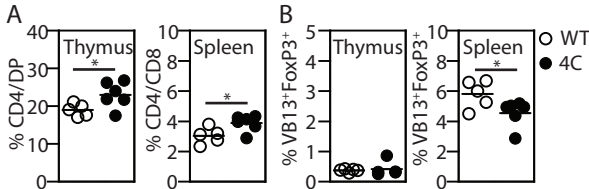

# Supplementary Figure 5

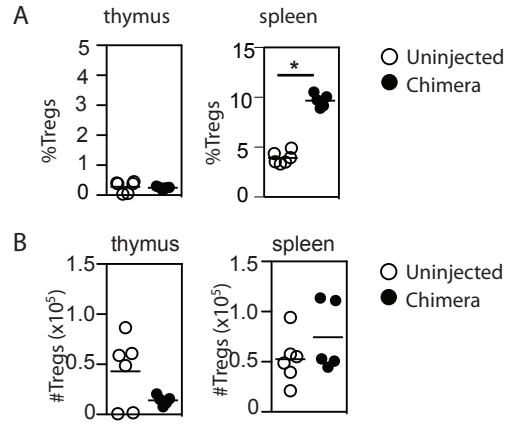

Supplement: supp_blood-2012-10-463174_blood-2012-10-463174-1.pdf [file supp_blood-2012-10-463174_blood-2012-10-463174-1.pdf]
